# Supplementary material for: Wearable Feet Pressure Sensor for Human Gait and Falling Diagnosis
Source: MDPI journal article supplement (doi:10.3390/s21155240), 2021-08-03
Supplement: s1 [file s1]

## Supplement

# Wearable feet pressure sensor for human gait and falling diagnosis

Vytautas Bucinskas, Andrius Dzedzickis, Juste Rozene, Jurga Subaciute-Zemaitiene, Igoris Satkauskas, Valentinas Uvarovas, Rokas Bobina and Inga Morkvenaite-Vilkonciene

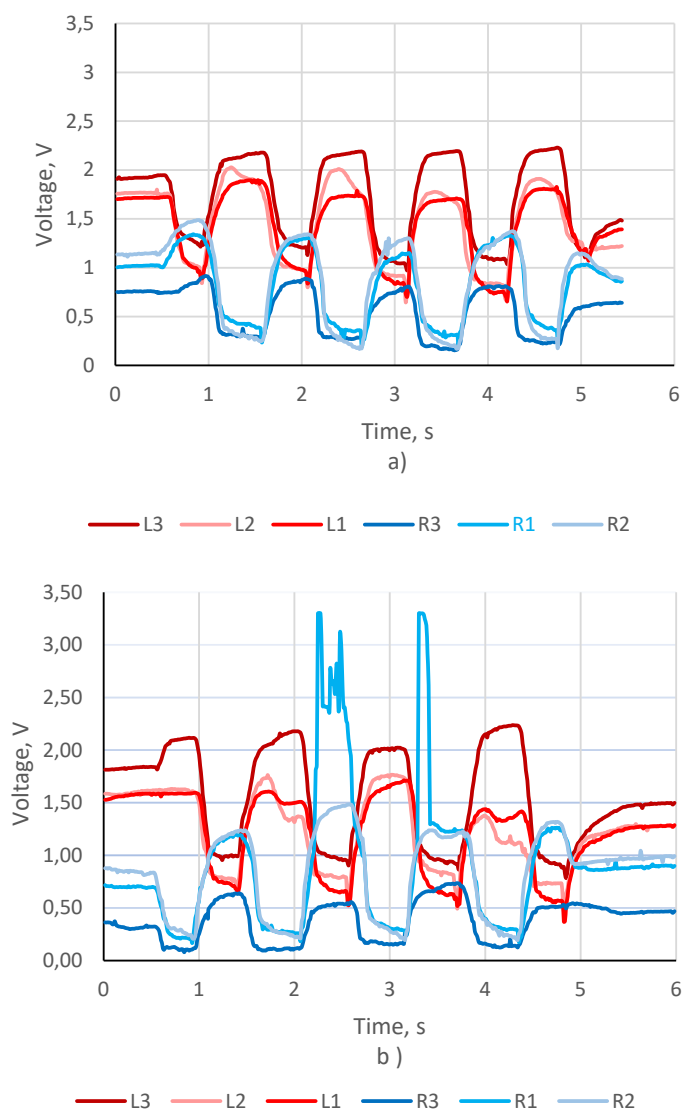

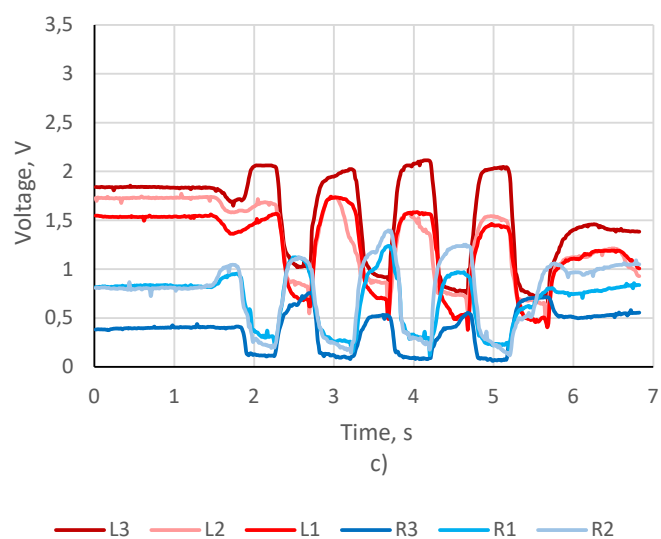

Figure S1: Turnaround gate phase, first, second and third try (a, b, c)

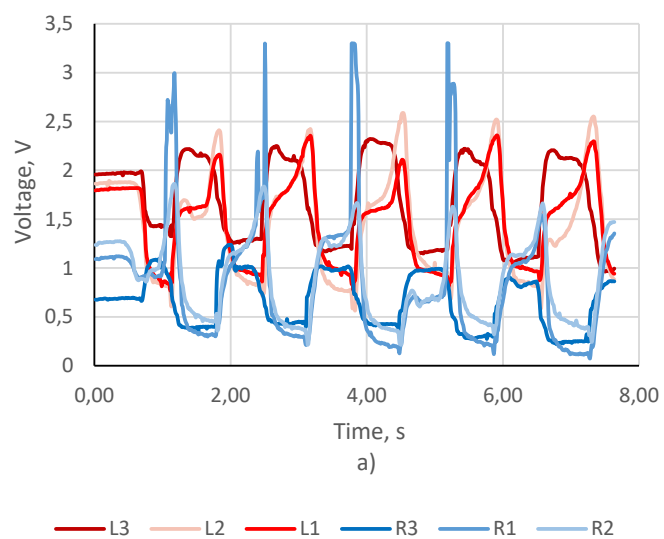

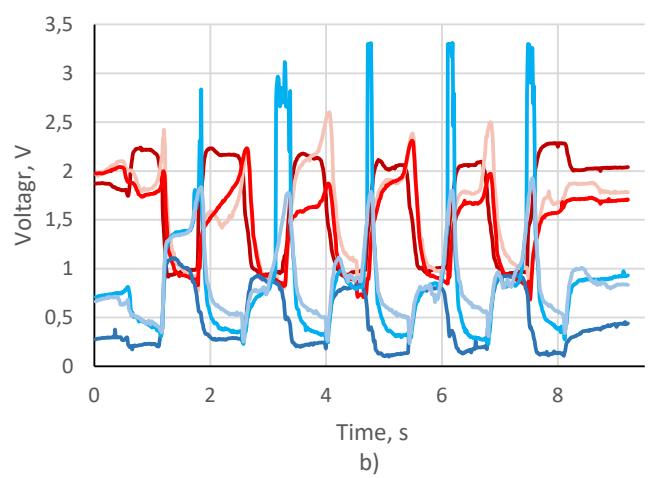

— L3 — L2 — L1 — R3 — R1 — R2

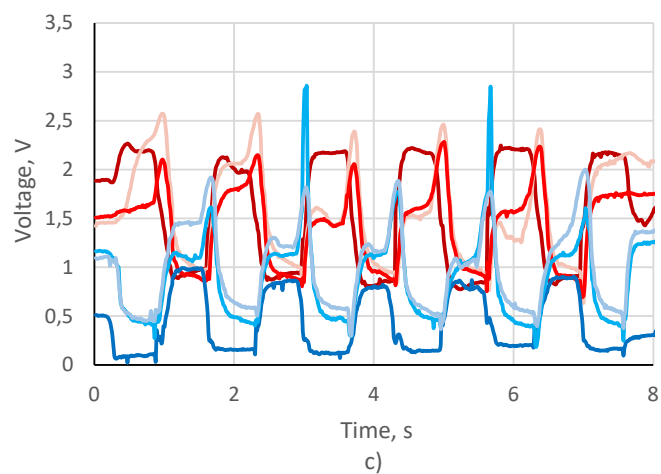

— L3 — L2 — L1 — R3 — R1 — R2

Figure S2: Upstairs gate phase, first, second and third try (a,b,c)

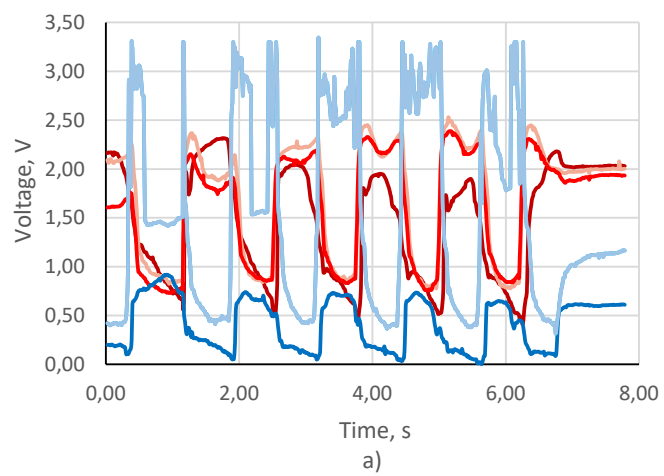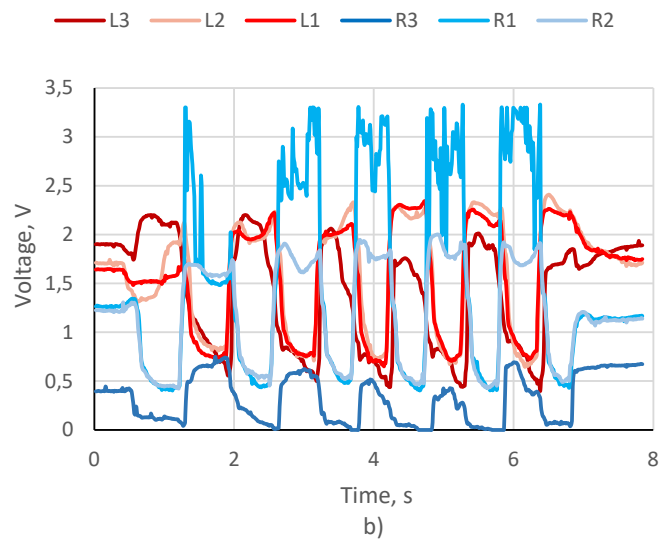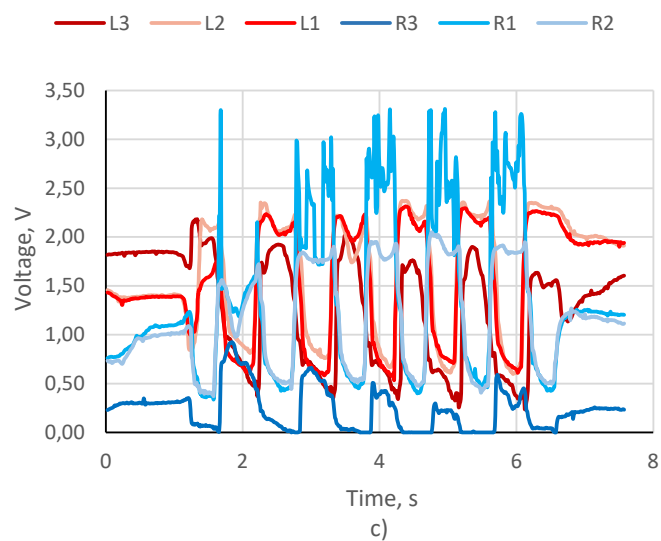

Figure S3: Downstairs gate phase, first, second and third try (a,b,c)

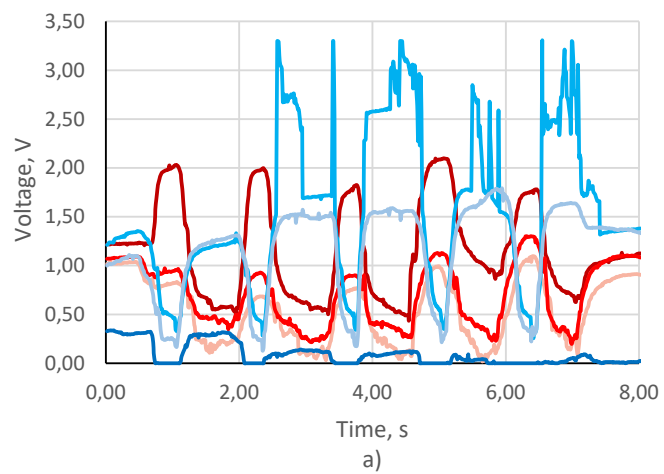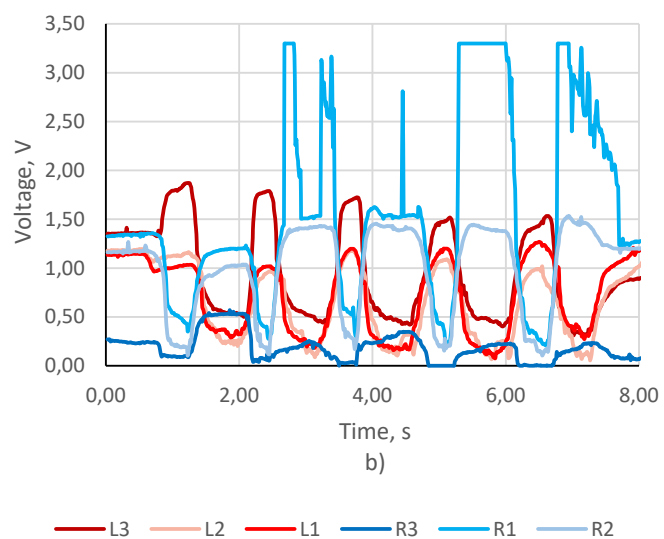

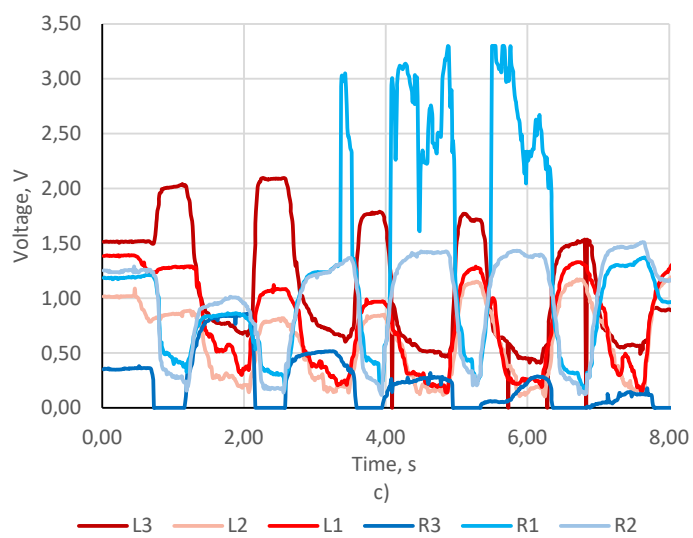

Figure S4: Scrolling gate phase, first, second and third try (a,b,c)

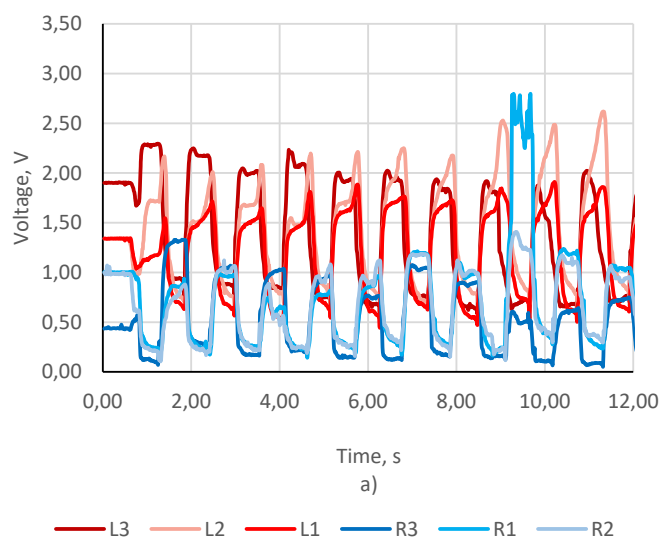

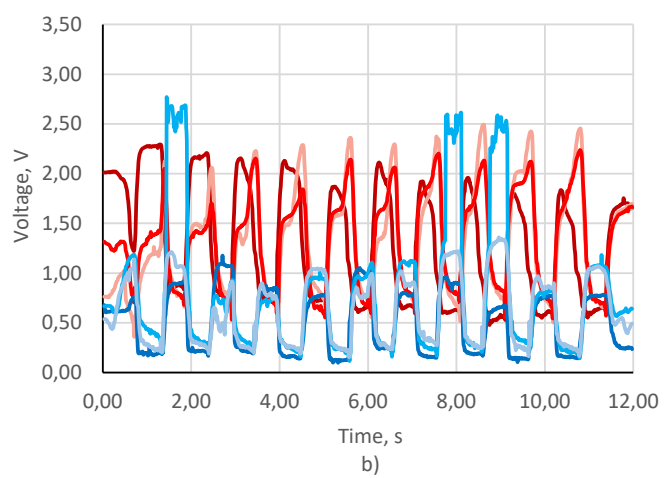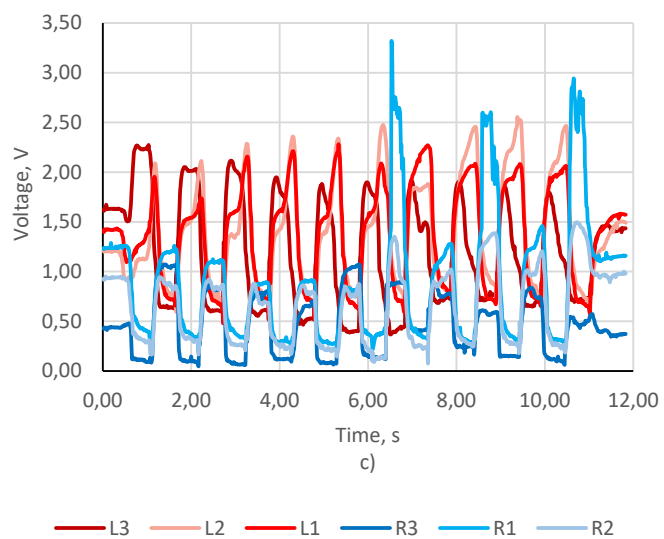

Figure S5: Upstairs one by one gate phase, first, second and third try (a,b,c)

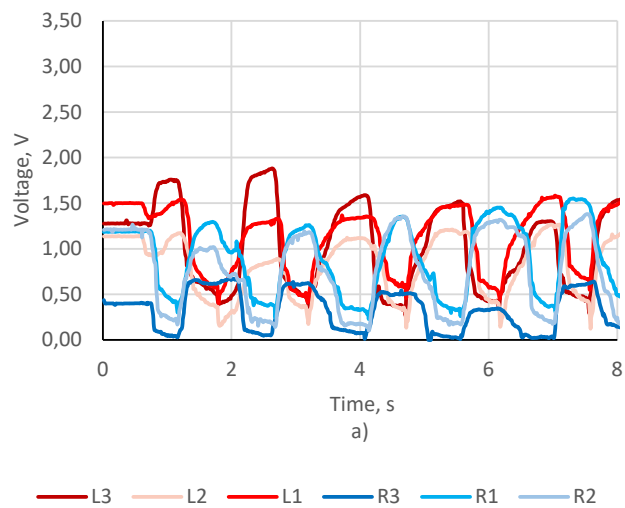

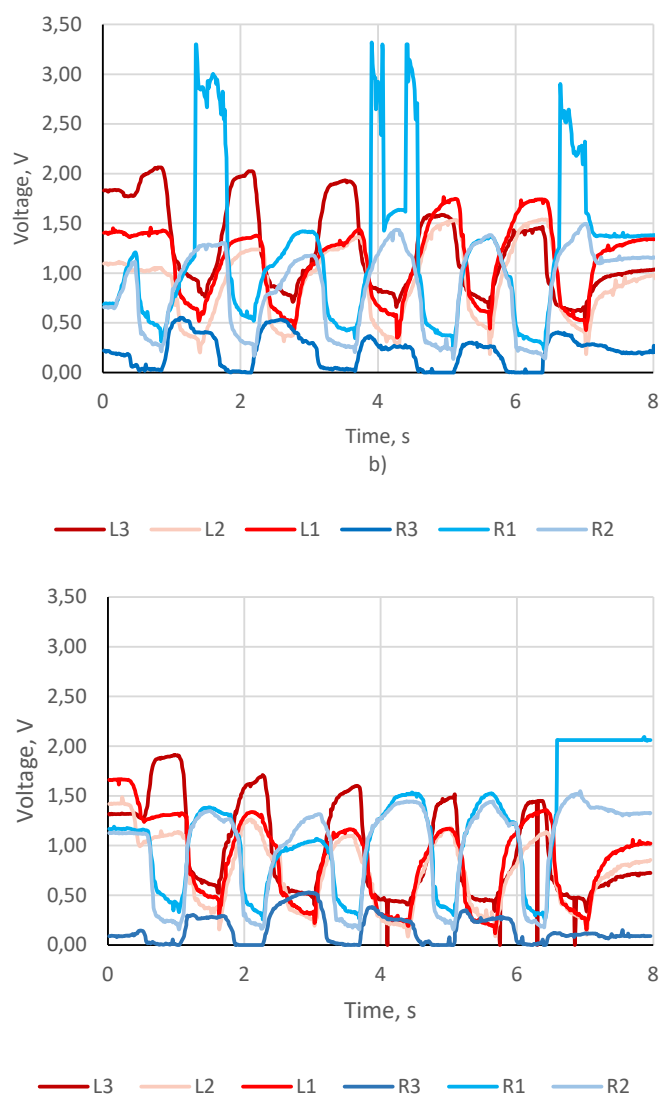

Figure S6: Walk with one straight leg gate phase, first, second and third try
